# Supplementary material for: Associations between Perceived Outdoor Environment and Walking Modifications in Community-Dwelling Older People: A Two-Year Follow-Up Study
Source: PubMed Central journal article supplement (PMC8688982; doi:10.1177/0898264320944289), 2020-07-28
Supplement: Supplemental_tables.pdf [file Supplemental_tables.pdf]

Supplementary Table 1. Sensitivity Analyses. Cross-sectional Associations of Perceived Environmental Facilitators for Outdoor Mobility with Walking Modifications in Community-Dwelling Older People. Odds are Reported for those with No Modifications (n = 280) and Adaptive Modifications (n = 315) vs. Maladaptive Modifications (n = 123, reference).

| Facilitators                                                                   | Model 1                            |                  |                                          |                  | Model 2                            |                  |                                          |                  |
|--------------------------------------------------------------------------------|------------------------------------|------------------|------------------------------------------|------------------|------------------------------------|------------------|------------------------------------------|------------------|
|                                                                                | No walking modifications (n = 280) |                  | Adaptive walking modifications (n = 315) |                  | No walking modifications (n = 280) |                  | Adaptive walking modifications (n = 315) |                  |
|                                                                                | OR (95 % CI)                       | Adjusted p-value | OR (95 % CI)                             | Adjusted p-value | OR (95 % CI)                       | Adjusted p-value | OR (95 % CI)                             | Adjusted p-value |
| <b>Sum of nature facilitators</b>                                              |                                    |                  |                                          |                  |                                    |                  |                                          |                  |
| 1 vs. 0                                                                        | 0.9 (0.4–1.9)                      | 0.906            | 0.6 (0.3–1.1)                            | 0.166            | 0.8 (0.4–1.8)                      | 0.761            | 0.5 (0.3–1.0)                            | 0.194            |
| ≥ 2 vs. 0                                                                      | 1.9 (1.0–3.9)                      | 0.141            | 0.9 (0.5–1.7)                            | 0.841            | 1.8 (0.9–3.8)                      | 0.289            | 0.9 (0.5–1.7)                            | 0.821            |
| <b>Sum of infrastructure facilitators</b>                                      |                                    |                  |                                          |                  |                                    |                  |                                          |                  |
| 1 vs. 0                                                                        | 1.3 (0.7–2.5)                      | 0.565            | 1.2 (0.6–2.1)                            | 0.793            | 1.4 (0.7–2.8)                      | 0.516            | 1.2 (0.7–2.3)                            | 0.709            |
| ≥ 2 vs. 0                                                                      | 1.5 (0.9–2.5)                      | 0.265            | 1.5 (0.9–2.4)                            | 0.242            | 1.6 (0.9–2.9)                      | 0.253            | 1.6 (0.9–2.6)                            | 0.246            |
| <b>Sum of safety facilitators</b>                                              |                                    |                  |                                          |                  |                                    |                  |                                          |                  |
| 1 vs. 0                                                                        | 0.6 (0.3–1.4)                      | 0.372            | 1.6 (0.8–3.4)                            | 0.323            | 0.6 (0.3–1.4)                      | 0.398            | 1.6 (0.8–3.4)                            | 0.402            |
| ≥ 2 vs. 0                                                                      | 1.4 (0.8–2.7)                      | 0.377            | 1.8 (0.9–3.3)                            | 0.157            | 1.5 (0.8–3.0)                      | 0.417            | 1.9 (1.0–3.6)                            | 0.170            |
| <b>Item-specific</b>                                                           |                                    |                  |                                          |                  |                                    |                  |                                          |                  |
| <i>Nature</i>                                                                  |                                    |                  |                                          |                  |                                    |                  |                                          |                  |
| Park or other green area                                                       | 1.2 (0.8–1.9)                      | 0.606            | 1.1 (0.8–1.8)                            | 0.674            | 1.2 (0.7–1.9)                      | 0.709            | 1.1 (0.7–1.8)                            | 0.733            |
| Walking trail, skiing track                                                    | <b>2.8 (1.8–4.4)</b>               | <b>&lt;0.001</b> | 1.3 (0.8–1.9)                            | 0.377            | <b>2.8 (1.7–4.5)</b>               | <b>&lt;0.001</b> | 1.3 (0.9–2.0)                            | 0.383            |
| Nature, lakeside                                                               | 1.2 (0.7–2.1)                      | 0.589            | 0.9 (0.5–1.4)                            | 0.658            | 1.2 (0.7–2.1)                      | 0.709            | 0.9 (0.5–1.4)                            | 0.709            |
| <i>Infrastructure</i>                                                          |                                    |                  |                                          |                  |                                    |                  |                                          |                  |
| Good lighting                                                                  | 1.4 (0.9–2.2)                      | 0.273            | 1.3 (0.8–2.0)                            | 0.404            | 1.4 (0.9–2.2)                      | 0.377            | 1.3 (0.8–2.0)                            | 0.417            |
| Peaceful and good quality walkways                                             | 1.6 (1.0–2.5)                      | 0.097            | 1.4 (0.9–2.1)                            | 0.252            | 1.7 (1.0–2.7)                      | 0.133            | 1.5 (1.0–2.3)                            | 0.176            |
| Even sidewalks                                                                 | 0.9 (0.5–1.4)                      | 0.756            | 1.4 (0.9–2.1)                            | 0.311            | 1.0 (0.6–1.7)                      | 0.971            | 1.4 (0.9–2.3)                            | 0.290            |
| Resting places by the walking route                                            | 0.8 (0.5–1.4)                      | 0.645            | 1.3 (0.8–2.2)                            | 0.442            | 1.0 (0.6–1.9)                      | 0.945            | 1.4 (0.8–2.3)                            | 0.393            |
| Walkways without steep hills                                                   | 1.1 (0.5–2.1)                      | 0.964            | 1.5 (0.8–2.8)                            | 0.313            | 1.5 (0.7–3.1)                      | 0.513            | 1.8 (0.9–3.5)                            | 0.213            |
| Services close                                                                 | 1.4 (0.9–2.2)                      | 0.252            | 1.3 (0.9–2.0)                            | 0.343            | 1.4 (0.9–2.3)                      | 0.311            | 1.3 (0.9–2.0)                            | 0.388            |
| Safe crossings: Traffic lights, zebra crossing or traffic island between lanes | 1.2 (0.7–2.0)                      | 0.624            | 1.4 (0.9–2.3)                            | 0.295            | 1.2 (0.7–2.1)                      | 0.672            | 1.5 (0.9–2.4)                            | 0.302            |
| <i>Safety</i>                                                                  |                                    |                  |                                          |                  |                                    |                  |                                          |                  |
| Familiar environment                                                           | <b>1.8 (1.2–2.9)</b>               | <b>0.030</b>     | 1.3 (0.9–2.1)                            | 0.295            | <b>2.0 (1.2–3.2)</b>               | <b>0.028</b>     | 1.4 (0.9–2.2)                            | 0.265            |
| Appealing scenery                                                              | 1.3 (0.8–2.1)                      | 0.370            | 1.1 (0.7–1.7)                            | 0.887            | 1.4 (0.9–2.4)                      | 0.352            | 1.1 (0.7–1.7)                            | 0.817            |
| Own yard                                                                       | 1.0 (0.7–1.6)                      | 0.977            | 1.1 (0.8–1.7)                            | 0.691            | 0.9 (0.6–1.4)                      | 0.768            | 1.2 (0.8–1.9)                            | 0.584            |
| Other people outdoors motivate                                                 | 1.3 (0.8–2.3)                      | 0.442            | 1.2 (0.7–2.0)                            | 0.645            | 1.7 (0.9–3.0)                      | 0.239            | 1.4 (0.8–2.3)                            | 0.458            |
| No car traffic                                                                 | 1.1 (0.6–2.1)                      | 0.841            | 1.0 (0.6–1.9)                            | 0.972            | 1.2 (0.6–2.4)                      | 0.731            | 1.1 (0.6–2.0)                            | 0.878            |
| No cyclists on walkways                                                        | 0.8 (0.3–1.9)                      | 0.691            | 0.8 (0.3–1.9)                            | 0.691            | 0.7 (0.3–2.0)                      | 0.709            | 0.8 (0.3–1.9)                            | 0.709            |

Note: Multinomial logistic regression analyses. Reference category: maladaptive walking modifications, n = 123. Model 1: Adjusted for age and sex. Model 2: Adjusted for age, sex, years of education, depressive symptoms, chronic conditions, and lower extremity function. OR = Odds Ratio; CI = Confidence Interval. False discovery rates (adjusted p-values) were calculated to correct for multiple testing.

Supplementary Table 2. Sensitivity Analyses. Cross-sectional Associations of Perceived Environmental Barriers to Outdoor Mobility with Walking Modifications among Community-Dwelling Older People. Odds are Reported for those with Adaptive Modifications (n = 315) and Maladaptive Modifications (n = 123) vs. those with No Modifications (n = 280, reference).

| Barriers                              | Model 1                                  |                  |                                             |                  | Model 2                                  |                  |                                             |                  |
|---------------------------------------|------------------------------------------|------------------|---------------------------------------------|------------------|------------------------------------------|------------------|---------------------------------------------|------------------|
|                                       | Adaptive walking modifications (n = 315) |                  | Maladaptive walking modifications (n = 123) |                  | Adaptive walking modifications (n = 315) |                  | Maladaptive walking modifications (n = 123) |                  |
|                                       | OR (95 % CI)                             | Adjusted p-value | OR (95 % CI)                                | Adjusted p-value | OR (95 % CI)                             | Adjusted p-value | OR (95 % CI)                                | Adjusted p-value |
| <b>Sum of nature barriers</b>         |                                          |                  |                                             |                  |                                          |                  |                                             |                  |
| 1 vs. 0                               | <b>2.4 (1.6–3.4)</b>                     | <b>&lt;0.001</b> | 1.8 (1.1–2.9)                               | 0.045            | <b>1.8 (1.2–2.7)</b>                     | <b>0.020</b>     | 1.1 (0.7–1.9)                               | 0.768            |
| 2 vs. 0                               | <b>4.9 (2.9–8.5)</b>                     | <b>&lt;0.001</b> | 2.2 (1.1–4.5)                               | 0.087            | <b>3.6 (2.0–6.5)</b>                     | <b>&lt;0.001</b> | 1.4 (0.6–2.9)                               | 0.620            |
| <b>Sum of infrastructure barriers</b> |                                          |                  |                                             |                  |                                          |                  |                                             |                  |
| 1 vs. 0                               | <b>1.6 (1.1–2.5)</b>                     | 0.087            | 1.9 (1.1–3.2)                               | 0.074            | 1.4 (0.9–2.1)                            | 0.383            | 1.5 (0.8–2.7)                               | 0.377            |
| ≥ 2 vs. 0                             | <b>4.0 (2.4–6.7)</b>                     | <b>&lt;0.001</b> | <b>3.7 (2.0–7.0)</b>                        | <b>&lt;0.001</b> | <b>2.6 (1.5–4.6)</b>                     | <b>0.006</b>     | <b>2.2 (1.1–4.3)</b>                        | 0.094            |
| <b>Sum of safety barriers</b>         |                                          |                  |                                             |                  |                                          |                  |                                             |                  |
| 1 vs. 0                               | 1.5 (0.9–2.3)                            | 0.187            | 1.0 (0.5–1.8)                               | 0.968            | 1.2 (0.8–2.0)                            | 0.609            | 0.8 (0.4–1.5)                               | 0.682            |
| ≥ 2 vs. 0                             | <b>2.3 (1.3–4.0)</b>                     | <b>0.012</b>     | 1.2 (0.6–2.6)                               | 0.756            | 1.5 (0.8–2.6)                            | 0.401            | 0.7 (0.3–1.6)                               | 0.542            |
| <b>Item-specific</b>                  |                                          |                  |                                             |                  |                                          |                  |                                             |                  |
| <i>Nature</i>                         |                                          |                  |                                             |                  |                                          |                  |                                             |                  |
| Hills in the nearby environment       | <b>2.6 (1.6–4.0)</b>                     | <b>&lt;0.001</b> | 1.9 (1.1–3.3)                               | 0.090            | <b>2.1 (1.3–3.3)</b>                     | <b>0.015</b>     | 1.5 (0.8–2.7)                               | 0.402            |
| Snow and ice in winter                | <b>2.9 (2.0–4.0)</b>                     | <b>&lt;0.001</b> | 1.6 (1.0–2.5)                               | 0.090            | <b>2.2 (1.5–3.2)</b>                     | <b>&lt;0.001</b> | 1.1 (0.7–1.7)                               | 0.894            |
| <i>Infrastructure</i>                 |                                          |                  |                                             |                  |                                          |                  |                                             |                  |
| Poor street condition                 | 1.5 (1.0–2.3)                            | 0.140            | 0.8 (0.4–1.5)                               | 0.645            | 1.2 (0.7–1.9)                            | 0.709            | 0.5 (0.3–1.1)                               | 0.210            |
| High curbs                            | <b>3.6 (1.4–9.1)</b>                     | <b>0.023</b>     | 2.3 (0.7–7.3)                               | 0.268            | 2.2 (0.8–6.1)                            | 0.298            | 1.1 (0.3–3.9)                               | 0.941            |
| Lack of pedestrian zones              | 2.2 (0.8–6.5)                            | 0.268            | 2.4 (0.7–8.8)                               | 0.295            | 2.9 (0.9–9.8)                            | 0.226            | 3.3 (0.8–13.8)                              | 0.254            |
| Long distances to services            | 2.1 (1.0–4.2)                            | 0.119            | <b>4.7 (2.2–9.8)</b>                        | <b>&lt;0.001</b> | 1.8 (0.8–3.9)                            | 0.298            | <b>4.0 (1.7–9.1)</b>                        | <b>0.006</b>     |
| Lack of resting places, summer        | <b>3.4 (1.9–6.0)</b>                     | <b>&lt;0.001</b> | <b>4.0 (2.0–7.9)</b>                        | <b>&lt;0.001</b> | 2.1 (1.1–4.0)                            | 0.072            | 2.4 (1.1–4.8)                               | 0.080            |
| Lack of resting places, winter        | <b>3.5 (2.0–5.9)</b>                     | <b>&lt;0.001</b> | <b>3.4 (1.8–6.3)</b>                        | <b>&lt;0.001</b> | <b>2.4 (1.4–4.3)</b>                     | <b>0.015</b>     | 2.2 (1.1–4.3)                               | 0.102            |
| Poor lighting                         | 2.7 (1.0–7.2)                            | 0.119            | 1.3 (0.3–5.4)                               | 0.841            | 2.2 (0.8–6.2)                            | 0.320            | 1.0 (0.2–4.3)                               | 0.962            |
| <i>Safety</i>                         |                                          |                  |                                             |                  |                                          |                  |                                             |                  |
| Noisy traffic                         | 3.2 (1.2–8.9)                            | 0.078            | 2.8 (0.8–9.7)                               | 0.197            | 2.0 (0.7–6.2)                            | 0.389            | 2.0 (0.5–7.4)                               | 0.498            |
| Busy traffic                          | 2.4 (1.2–4.6)                            | 0.045            | 2.2 (0.9–5.0)                               | 0.152            | 1.7 (0.8–3.6)                            | 0.302            | 1.6 (0.6–3.8)                               | 0.516            |
| Dangerous crossroads                  | 2.0 (1.1–3.6)                            | 0.076            | 1.3 (0.6–2.9)                               | 0.712            | 1.6 (0.8–2.9)                            | 0.352            | 1.0 (0.4–2.3)                               | 0.945            |
| Vehicles on walkways                  | 1.1 (0.3–4.2)                            | 0.972            | 1.0 (0.2–6.0)                               | 0.995            | 0.8 (0.2–3.6)                            | 0.886            | 0.7 (0.1–4.6)                               | 0.821            |
| Cyclists in the walkways              | 1.5 (0.9–2.3)                            | 0.142            | 0.7 (0.4–1.4)                               | 0.502            | 1.2 (0.7–1.8)                            | 0.715            | 0.5 (0.3–1.0)                               | 0.194            |
| Insecurity due to other pedestrians   | 1.7 (0.8–3.4)                            | 0.295            | 0.9 (0.3–2.7)                               | 0.968            | 1.0 (0.4–2.2)                            | 0.971            | 0.5 (0.2–1.6)                               | 0.417            |

Note: Multinomial logistic regression analyses. Reference category: no walking modifications, n = 280. Model 1: Adjusted for age and sex. Model 2: Adjusted for age, sex, years of education, depressive symptoms, chronic conditions, and lower extremity function. OR = Odds Ratio; CI = Confidence Interval. False discovery rates (adjusted p-values) were calculated to correct for multiple testing.

Supplementary Table 3. Sensitivity Analyses. Perceived Environmental Facilitators for Outdoor Mobility as Predictors of Use of Maladaptive Walking Modifications over the 2-Year Follow-Up in Community-Dwelling Older People (N = 605).

| Facilitators                                                                   | Maladaptive walking modifications |                  |                      |                  |
|--------------------------------------------------------------------------------|-----------------------------------|------------------|----------------------|------------------|
|                                                                                | Model 1                           |                  | Model 2              |                  |
|                                                                                | OR (95 % CI)                      | Adjusted p-value | OR (95 % CI)         | Adjusted p-value |
| <b>Sum of nature facilitators</b>                                              |                                   |                  |                      |                  |
| 1 vs. 0                                                                        | 0.7 (0.4–1.1)                     | 0.268            | 0.7 (0.4–1.7)        | 0.277            |
| ≥ 2 vs. 0                                                                      | 0.9 (0.5–1.7)                     | 0.931            | 1.0 (0.5–1.7)        | 0.910            |
| <b>Sum of infrastructure facilitators</b>                                      |                                   |                  |                      |                  |
| 1 vs. 0                                                                        | 0.9 (0.6–1.5)                     | 0.892            | 0.9 (0.5–1.6)        | 0.664            |
| ≥ 2 vs. 0                                                                      | 0.9 (0.5–1.5)                     | 0.841            | 0.9 (0.5–1.6)        | 0.843            |
| <b>Sum of safety facilitators</b>                                              |                                   |                  |                      |                  |
| 1 vs. 0                                                                        | 1.0 (0.6–1.8)                     | 0.980            | 0.9 (0.5–1.7)        | 0.857            |
| ≥ 2 vs. 0                                                                      | 1.9 (0.9–3.7)                     | 0.154            | 1.7 (0.8–3.3)        | 0.329            |
| <b>Item-specific</b>                                                           |                                   |                  |                      |                  |
| <i>Nature</i>                                                                  |                                   |                  |                      |                  |
| Park or other green area                                                       | 0.8 (0.6–1.2)                     | 0.242            | 0.7 (0.5–1.1)        | 0.258            |
| Walking trail, skiing track                                                    | <b>0.5 (0.4–0.7)</b>              | <b>&lt;0.001</b> | <b>0.5 (0.3–0.7)</b> | <b>&lt;0.001</b> |
| Nature, lakeside                                                               | 1.2 (0.8–1.9)                     | 0.471            | 1.3 (0.8–1.9)        | 0.481            |
| <i>Infrastructure</i>                                                          |                                   |                  |                      |                  |
| Good lighting                                                                  | 0.9 (0.7–1.3)                     | 0.841            | 0.9 (0.6–1.3)        | 0.761            |
| Peaceful and good quality walkways                                             | 0.9 (0.6–1.2)                     | 0.645            | 0.9 (0.6–1.2)        | 0.584            |
| Even sidewalks                                                                 | 1.3 (0.9–1.8)                     | 0.353            | 1.2 (0.8–1.7)        | 0.584            |
| Resting places by the walking route                                            | 1.5 (1.0–2.3)                     | 0.123            | 1.4 (0.9–2.1)        | 0.330            |
| Walkways without steep hills                                                   | 1.2 (0.7–1.9)                     | 0.661            | 1.1 (0.7–1.9)        | 0.777            |
| Services close                                                                 | 1.2 (0.8–1.6)                     | 0.598            | 1.2 (0.8–1.7)        | 0.540            |
| Safe crossings: Traffic lights, zebra crossing or traffic island between lanes | 0.9 (0.6–1.3)                     | 0.658            | 0.8 (0.6–1.3)        | 0.584            |
| <i>Safety</i>                                                                  |                                   |                  |                      |                  |
| Familiar environment                                                           | 1.0 (0.7–1.5)                     | 0.972            | 1.0 (0.7–1.5)        | 0.945            |
| Appealing scenery                                                              | 0.8 (0.5–1.1)                     | 0.268            | 0.8 (0.5–1.1)        | 0.321            |
| Own yard                                                                       | 1.1 (0.8–1.6)                     | 0.701            | 1.1 (0.8–1.6)        | 0.709            |
| Other people outdoors motivate                                                 | 0.9 (0.6–1.4)                     | 0.897            | 0.9 (0.6–1.3)        | 0.642            |
| No car traffic                                                                 | 0.9 (0.6–1.5)                     | 0.892            | 0.9 (0.5–1.4)        | 0.731            |
| No cyclists on walkways                                                        | 1.1 (0.5–2.5)                     | 0.917            | 1.0 (0.4–2.4)        | 0.971            |

*Note:* Development of maladaptive walking modifications was analyzed by using binary logistic regression models. Reference category: no and adaptive walking modifications. Model 1: Adjusted for age and sex. Model 2: Adjusted for age, sex, years of education, depressive symptoms, chronic conditions, and lower extremity function. OR = Odds Ratio; CI = Confidence Interval. False discovery rates (adjusted p-values) were calculated to correct for multiple testing.

Supplementary Table 4. Sensitivity Analyses. Perceived Environmental Barriers to Outdoor Mobility as Predictors of Use of Maladaptive Walking Modifications over 2-Year Follow-Up in Community-Dwelling Older People (N = 605).

| Barriers                              | Maladaptive walking modifications |                  |               |                  |
|---------------------------------------|-----------------------------------|------------------|---------------|------------------|
|                                       | Model 1                           |                  | Model 2       |                  |
|                                       | OR (95 % CI)                      | Adjusted p-value | OR (95 % CI)  | Adjusted p-value |
| <b>Sum of nature barriers</b>         |                                   |                  |               |                  |
| 1 vs. 0                               | <b>2.5 (1.5–4.1)</b>              | <b>&lt;0.001</b> | 2.0 (1.2–3.4) | 0.046            |
| 2 vs. 0                               | <b>1.7 (1.1–2.5)</b>              | <b>0.030</b>     | 1.4 (0.9–2.1) | 0.288            |
| <b>Sum of infrastructure barriers</b> |                                   |                  |               |                  |
| 1 vs. 0                               | 1.6 (1.0–2.5)                     | 0.119            | 1.3 (0.8–2.1) | 0.536            |
| ≥ 2 vs. 0                             | 1.2 (0.7–1.8)                     | 0.661            | 1.1 (0.7–1.7) | 0.900            |
| <b>Sum of safety barriers</b>         |                                   |                  |               |                  |
| 1 vs. 0                               | 1.1 (0.7–2.0)                     | 0.750            | 0.9 (0.5–1.6) | 0.836            |
| ≥ 2 vs. 0                             | 1.4 (0.9–2.2)                     | 0.229            | 1.3 (0.8–2.1) | 0.418            |
| <b>Item-specific</b>                  |                                   |                  |               |                  |
| <i>Nature</i>                         |                                   |                  |               |                  |
| Hills in the nearby environment       | <b>1.7 (1.1–2.7)</b>              | <b>0.040</b>     | 1.6 (1.0–2.4) | 0.170            |
| Snow and ice in winter                | <b>1.8 (1.3–2.6)</b>              | <b>0.004</b>     | 1.5 (1.1–2.2) | 0.102            |
| <i>Infrastructure</i>                 |                                   |                  |               |                  |
| Poor street condition                 | 1.5 (0.9–2.3)                     | 0.147            | 1.3 (0.8–2.0) | 0.436            |
| High curbs                            | 1.7 (0.8–3.5)                     | 0.273            | 1.2 (0.6–2.6) | 0.777            |
| Lack of pedestrian zones              | 1.0 (0.3–3.2)                     | 0.978            | 1.3 (0.4–4.2) | 0.768            |
| Long distances to services            | 1.0 (0.5–2.0)                     | 0.995            | 1.0 (0.5–1.9) | 0.945            |
| Lack of resting places, summer        | 1.4 (0.8–2.3)                     | 0.372            | 1.1 (0.6–1.8) | 0.878            |
| Lack of resting places, winter        | 1.6 (1.0–2.5)                     | 0.141            | 1.3 (0.8–2.1) | 0.533            |
| Poor lighting                         | 1.1 (0.4–2.6)                     | 0.969            | 0.8 (0.3–2.0) | 0.761            |
| <i>Safety</i>                         |                                   |                  |               |                  |
| Noisy traffic                         | 1.0 (0.4–2.5)                     | 0.977            | 0.7 (0.3–1.9) | 0.664            |
| Busy traffic                          | 1.9 (1.0–3.6)                     | 0.108            | 1.6 (0.8–3.1) | 0.318            |
| Dangerous crossroads                  | 1.2 (0.7–2.2)                     | 0.645            | 1.1 (0.6–1.9) | 0.886            |
| Vehicles on walkways                  | 0.9 (0.2–3.6)                     | 0.917            | 0.8 (0.2–3.4) | 0.851            |
| Cyclists in the walkways              | 1.3 (0.8–1.9)                     | 0.440            | 1.2 (0.7–1.8) | 0.709            |
| Insecurity due to other pedestrians   | 1.0 (0.5–2.1)                     | 0.977            | 0.8 (0.4–1.7) | 0.761            |

*Note:* Development of maladaptive walking modifications was analyzed by using binary logistic regression models. Reference category: no and adaptive walking modifications. Model 1: Adjusted for age and sex. Model 2: Adjusted for age, sex, years of education, depressive symptoms, chronic conditions and lower extremity function. OR = Odds Ratio; CI = Confidence Interval. False discovery rates (adjusted p-values) were calculated to correct for multiple testing.
